# Supplementary material for: How areN-methylcarbamates encapsulated by β-cyclodextrin: insight into the binding mechanism
Source: Royal Society of Chemistry journal article supplement (doi:10.1039/d3cp01252b), 2023-01-01
Supplement: d3cp01252b1.pdf [file d3cp01252b1.pdf]

## Supporting Information I for:

# **How are N-methylcarbamates encapsulated by $\beta$ -cyclodextrin: Insight into binding mechanism**

Xiaofang Bao<sup>a</sup>, Xiao Liu<sup>a</sup>, Ran Dou<sup>a</sup>, Sen Xu<sup>a</sup>, Dabin Liu<sup>a</sup>, Jun Luo<sup>a</sup>, Xuedong Gong<sup>a</sup>,  
Chung F. Wong<sup>b</sup>, Baojing Zhou<sup>a,\*</sup>

<sup>a</sup> Computational Institute for Molecules and Materials, School of Chemistry and Chemical Engineering, Nanjing University of Science and Technology, Nanjing 210094, China

<sup>b</sup> Department of Chemistry and Biochemistry and Center for Nanoscience, University of Missouri-Saint Louis, One University Boulevard, Saint Louis, MO 63121, United States

### **Contents:**

- 1. Initial structures for MD simulations**
- 2. The test of basis sets for ECD calculations**
- 3. The fluctuations of ECD and BA calculations**
- 4. Snap shots along optimal MD trajectories**
- 5. Cluster analysis**
- 6. The computed thermodynamic quantities**

## 1. Initial structures for MD simulations

Due to the complexity of the conformation space of the four  $\beta$ -CD/N-methylcarbamate systems, we construct four different initial conformations for each system (Fig. S1). The four guest molecules, i.e. PC, BC, CY, CF, can enter  $\beta$ -CD cavity either from the secondary or primary rims of  $\beta$ -CD. The best initial conformations for these systems turn out to be (a1), (b1), (c1) and (d1).

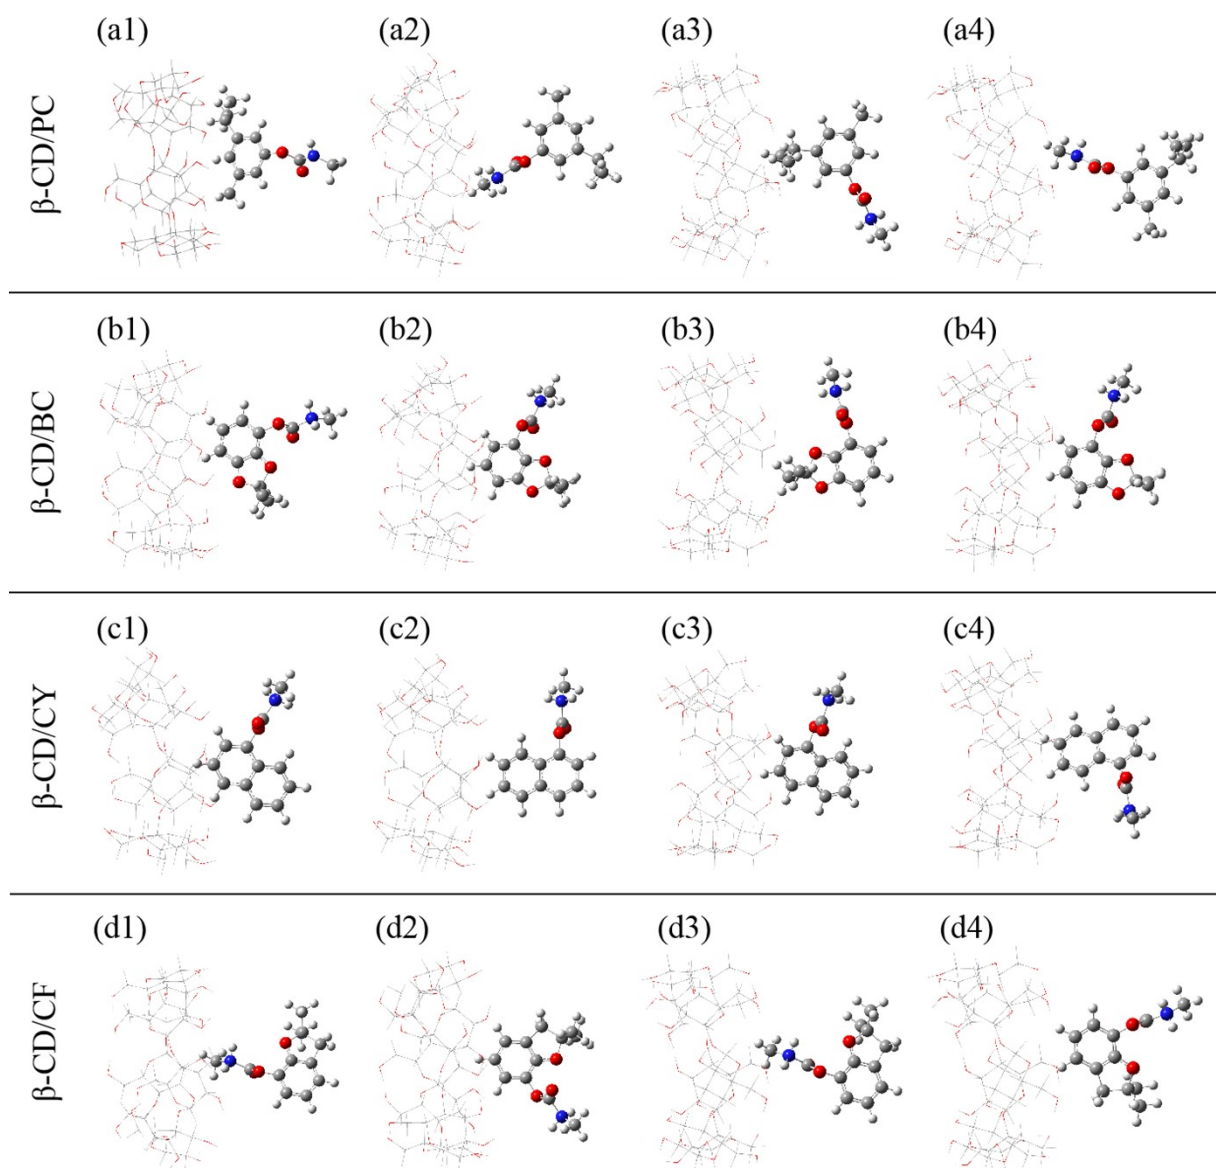

Fig. S1 The four initial structures used for MD simulations of each  $\beta$ -CD complex: (a) PC; (b) BC; (c) CY; (d) CF. The guest molecules in (1) and (2) is close to the secondary rim of  $\beta$ -CD, while those in (3) and (4) is close to the primary rim of  $\beta$ -CD.

## 2. The test of basis sets for ECD calculations

We perform additional tests using larger basis sets, i.e. 6-311G\*\* and 6-311++G\*\*, for ECD calculations using the four  $RC_{MM}$ . As illustrated in the Fig. S2, the three basis sets examined produce very close or similar ECD spectra. Considering the computational costs, we choose the 6-311G(d) basis set for ECD calculations in this study.

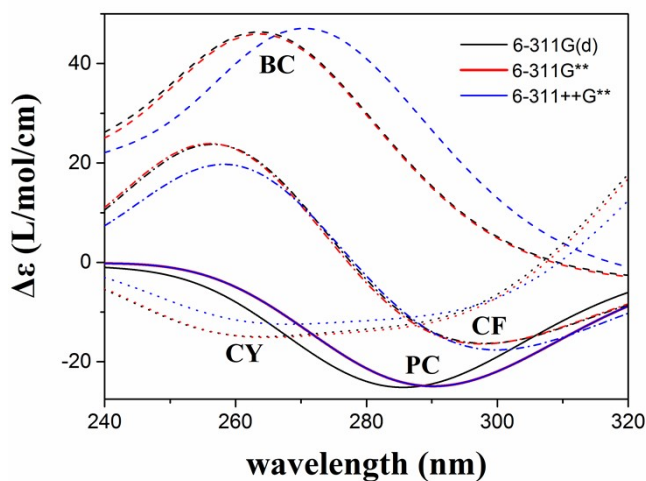

Fig. S2 Comparison of the ECD spectra computed from using B3LYP and three basis sets for the  $RC_{MM}$  of PC, BC, CY and CF.

## 3. The fluctuations of ECD and BA calculations

For each system, we extract RC candidates ( $RCC_i$ ,  $i$  is the  $i$ th MD trajectory) from MD trajectories using cluster analysis and MM energy minimization. For each system, three  $RCC_{i,j}$  are examined as shown in Fig. S3.

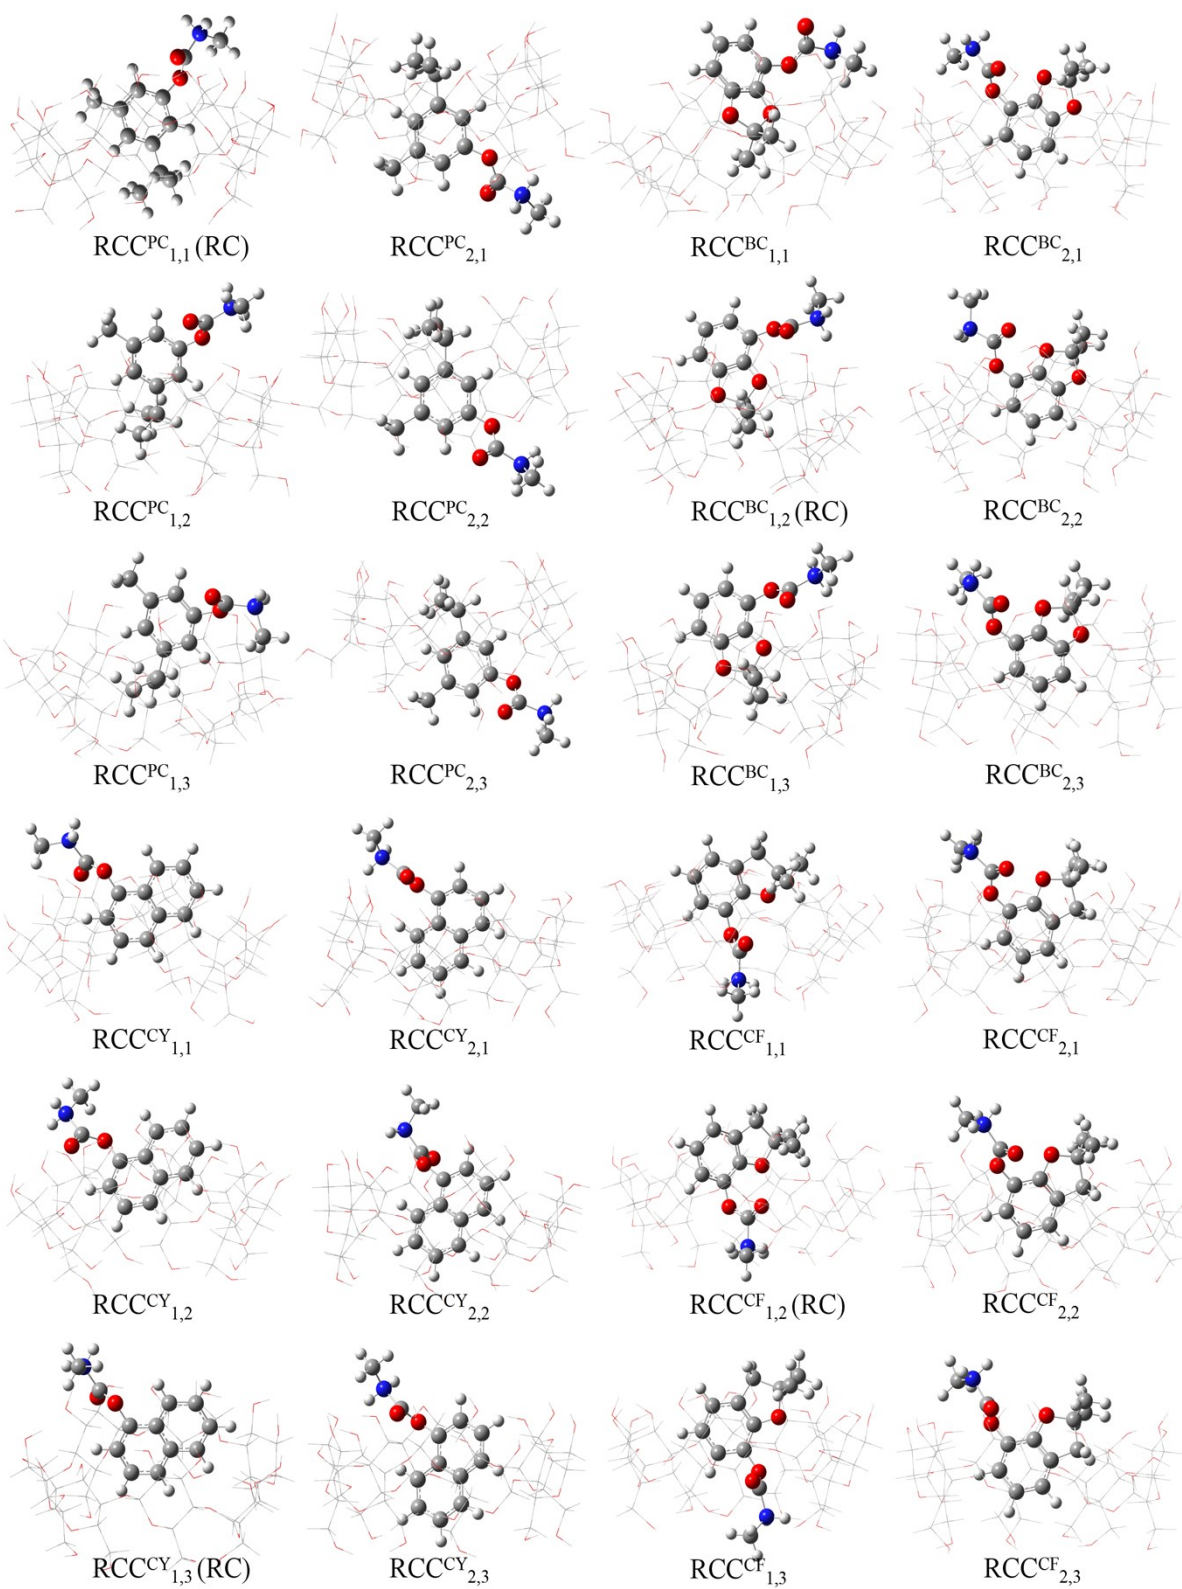

Fig. S3 The  $RCC^{A}_{i,j}$  ( $A=PC, BC, CY, CF$ ) for the four  $\beta$ -CD complexes.

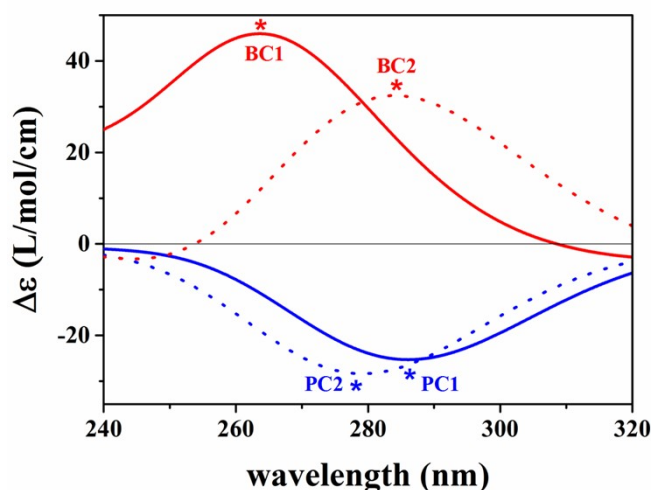

Fig. S4 Computed ECD spectra of  $\beta$ -CD/PC and  $\beta$ -CD/BC using  $RCC_1$  (solid lines) and  $RCC_2$  (dashed line) of. \* corresponds the maximum of  $\Delta\epsilon$ .

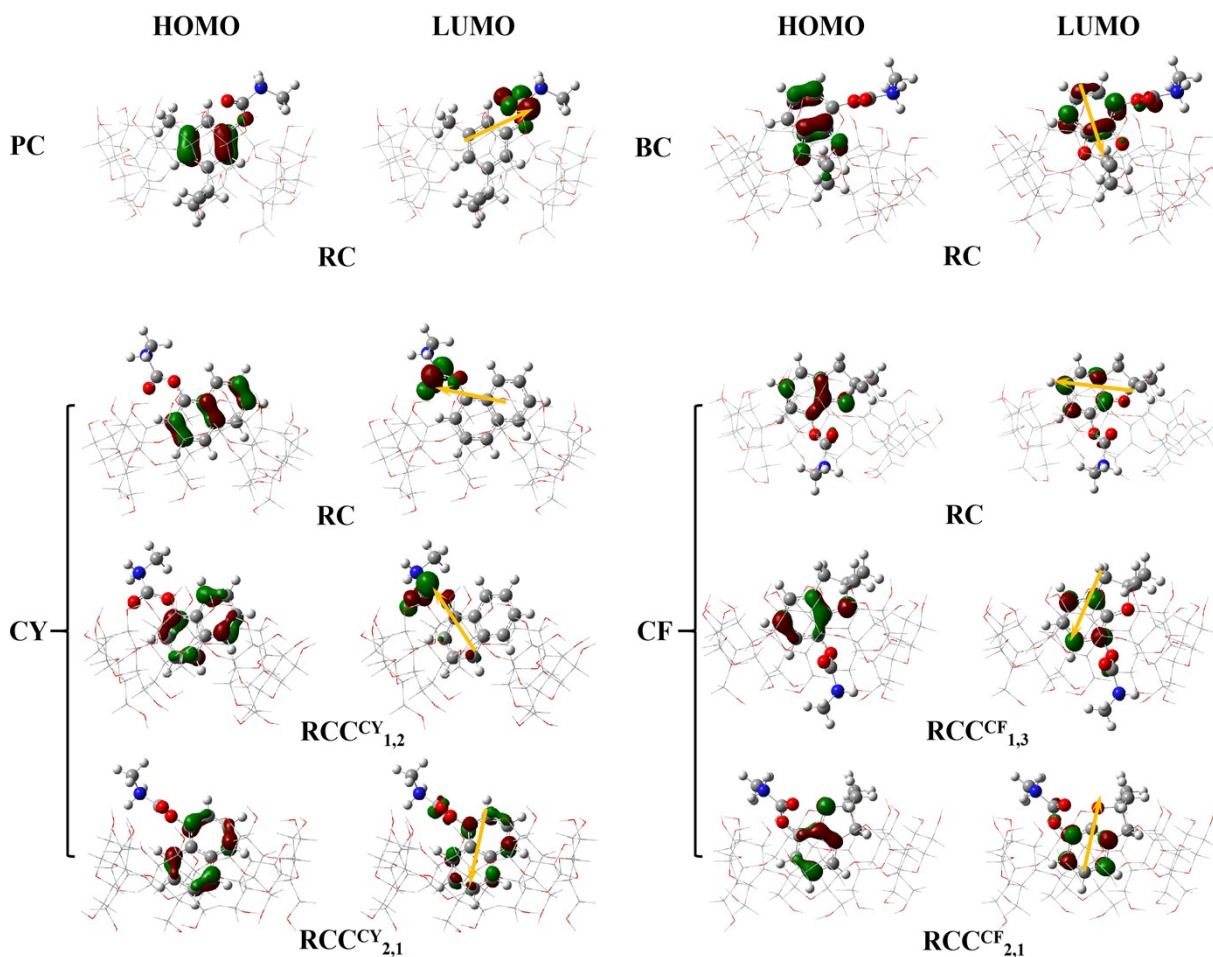

Fig. S5 The transition dipole moment of the host-guest system calculated by  $RCC_{MM}$ . The HOMO is on the left, and the LUMO is on the right. The arrows indicate the direction of the dipole moment of the electronic transition for each complex system. The secondary rim of the  $\beta$ -CD is located at the top.

Table S1 Computed BA in vacuum ( $\Delta G_{bind}^{vacu}$ ), solvent effect ( $\Delta G_{bind}^{solv}$ ) and BA ( $\Delta G_{bind}^{aqu}$ ) using RCC<sup>A</sup><sub>ij</sub>

(kcal·mol<sup>-1</sup>)

| Systems |                    | $\Delta G_{bind}^{vacu}$ | $\Delta G_{bind}^{solv}$ | $\Delta G_{bind}^{aqu}$ |
|---------|--------------------|--------------------------|--------------------------|-------------------------|
| PC      | RCC <sub>1,1</sub> | -20.0                    | 6.1                      | -13.9                   |
|         | RCC <sub>1,2</sub> | -20.0                    | 24.6                     | 4.6                     |
|         | RCC <sub>1,3</sub> | -3.0                     | 10.8                     | 7.7                     |
|         | RCC <sub>2,1</sub> | -12.0                    | 22.3                     | 10.3                    |
|         | RCC <sub>2,2</sub> | -12.0                    | 24.1                     | 12.0                    |
|         | RCC <sub>2,3</sub> | -7.0                     | 29.4                     | 22.4                    |
| BC      | RCC <sub>1,1</sub> | -12.0                    | 6.9                      | -5.1                    |
|         | RCC <sub>1,2</sub> | -20.0                    | 19.2                     | -0.9                    |
|         | RCC <sub>1,3</sub> | -13.0                    | 24.5                     | 11.5                    |
|         | RCC <sub>2,1</sub> | -18.0                    | 18.3                     | 0.3                     |
|         | RCC <sub>2,2</sub> | -16.0                    | 19.1                     | 3.1                     |
|         | RCC <sub>2,3</sub> | -9.0                     | 30.9                     | 21.9                    |
| CY      | RCC <sub>1,1</sub> | -11.0                    | 0.6                      | -10.4                   |
|         | RCC <sub>1,2</sub> | -1.0                     | 5.0                      | 4.0                     |
|         | RCC <sub>1,3</sub> | -22.0                    | 33.9                     | 11.9                    |
| CF      | RCC <sub>1,1</sub> | -23.0                    | 34.4                     | 11.3                    |
|         | RCC <sub>1,2</sub> | -23.0                    | 37.2                     | 14.2                    |
|         | RCC <sub>1,3</sub> | -21.0                    | 41.0                     | 20.0                    |

#### 4. Snap shots along optimal MD trajectories

Fig. S6 displays snapshots from the most successful MD trajectories of the  $\beta$ -CD inclusion process with BC, CY, and CF.

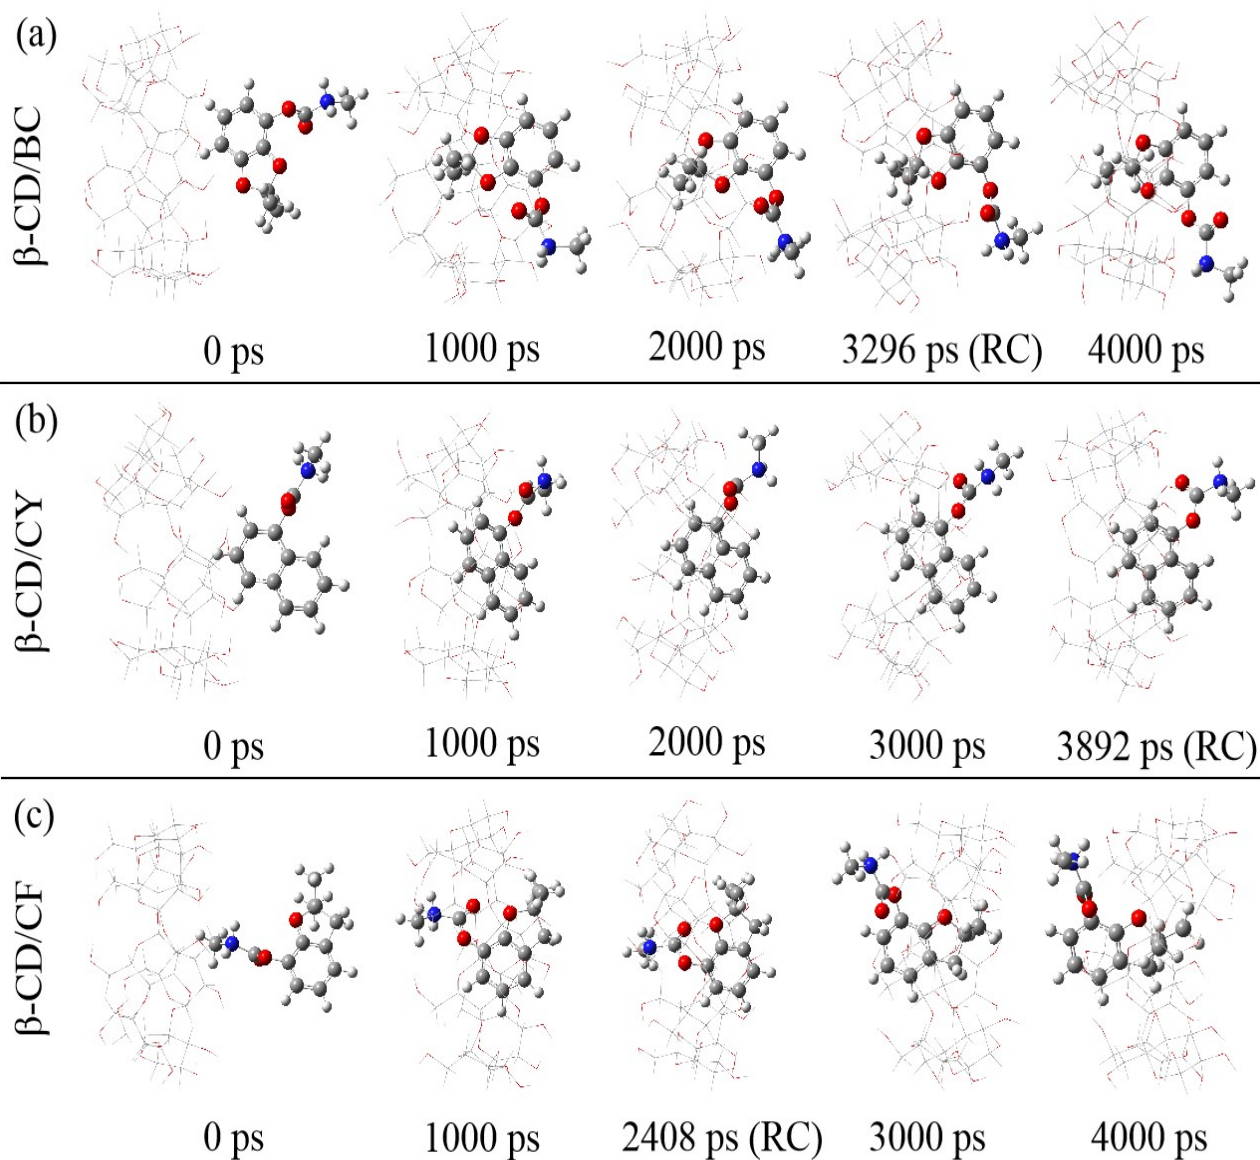

Fig. S6 The snapshots along the best MD trajectories showing the formation processes of the three host-guest systems: (a)  $\beta$ -CD/BC; (b)  $\beta$ -CD/CY; (c)  $\beta$ -CD/CF. The secondary rim of the  $\beta$ -CD is on the right.

## 5. Cluster analysis

Based on the structural similarity, cluster analysis is performed to classify the conformations along the MD trajectories of the host-guest systems. Those clusters from the optimal MD trajectories are shown in Fig. S7 for the  $\beta$ -CD/PC,  $\beta$ -CD/BC,  $\beta$ -CD/CY, and  $\beta$ -CD/CF systems.

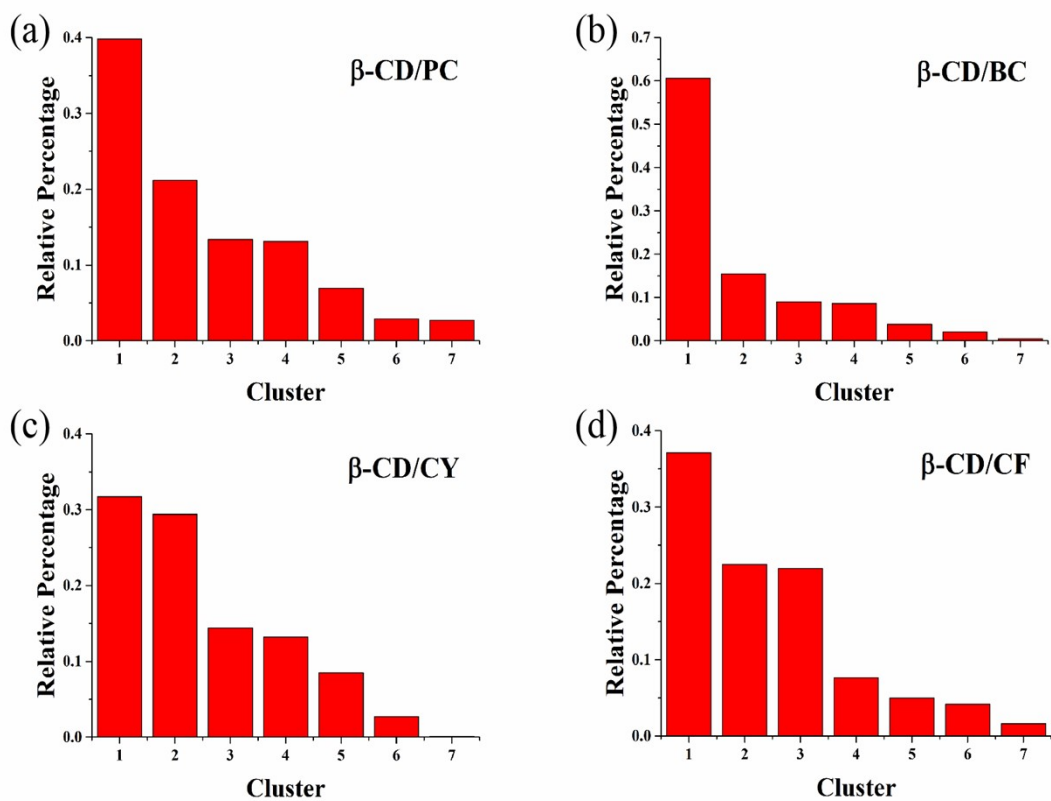

Fig. S7 The relative percentage of different clusters obtained from performing cluster analysis on the MD trajectories of the four inclusion systems.

## 6. The computed thermodynamic quantities

The non-covalent interaction is calculated by ONIOM2(B971/6-31G(d):PM6) method as follows:

$$\Delta E_{bind}^{vacu} = E_{comp, ONIOM2}^{vacu} - (E_{host, PM6}^{vacu} + E_{guest, B971}^{vacu}), [E = H, S, G].$$

The solvent effect is calculated by SMD method as:

$$G^{solv} = G^{elec} + G^{np}$$

$$\Delta G_{bind}^{solv} = G_{comp}^{solv} - (G_{host}^{solv} + G_{guest}^{solv})$$



Table S2 The computed thermodynamic data of  $\beta$ -CD, guest molecules and  $\beta$ -CD complexes  
(kcal·mol<sup>-1</sup>).

|                                 |                | $H_{bind}^{vacu}$ | $T \cdot S_{bind}^{vacu}$ | $G_{bind}^{vacu}$ | $G^{elec}$ | $G^{np}$ |
|---------------------------------|----------------|-------------------|---------------------------|-------------------|------------|----------|
| PM6                             | $\beta$ -CD    | -846.8            | 127.1                     | -974.0            | -139.1     | 16.7     |
| B971/6-<br>31G(d)               | PC             | -422051.5         | 40.7                      | -422092.2         | -73.3      | 8.8      |
|                                 | BC             | -491034.5         | 38.1                      | -491072.6         | -74.1      | 8.6      |
|                                 | CY             | -419828.6         | 34.9                      | -419863.6         | -75.1      | 7.1      |
|                                 | CF             | -468497.3         | 38.0                      | -468535.3         | -73.2      | 8.2      |
| ONIOM2(<br>B971/6-<br>31G(d):PM | $\beta$ -CD/PC | -422940.9         | 145.3                     | -423086.2         | -202.0     | 21.2     |
|                                 | $\beta$ -CD/BC | -491921.7         | 145.3                     | -492067.1         | -191.7     | 22.9     |
|                                 | $\beta$ -CD/CY | -420717.0         | 143.0                     | -420860.0         | -178.4     | 22.0     |
|                                 | $\beta$ -CD/CF | -469386.7         | 145.0                     | -469531.8         | -169.7     | 19.6     |
