# Supplementary material for: How areN-methylcarbamates encapsulated by β-cyclodextrin: insight into the binding mechanism
Source: Royal Society of Chemistry journal article supplement (doi:10.1039/d3cp01252b), 2023-01-01
Supplement: d3cp01252b2.pdf [file d3cp01252b2.pdf]

## Supporting Information II for:

# **How are N-methylcarbamates encapsulated by $\beta$ -cyclodextrin: Insight into binding mechanism**

Xiaofang Bao<sup>a</sup>, Xiao Liu<sup>a</sup>, Ran Dou<sup>a</sup>, Sen Xu<sup>a</sup>, Dabin Liu<sup>a</sup>, Jun Luo<sup>a</sup>, Xuedong Gong<sup>a</sup>,  
Chung F. Wong<sup>b</sup>, Baojing Zhou<sup>a,\*</sup>

<sup>a</sup> Computational Institute for Molecules and Materials, School of Chemistry and Chemical Engineering, Nanjing University of Science and Technology, Nanjing 210094, China

<sup>b</sup> Department of Chemistry and Biochemistry and Center for Nanoscience, University of Missouri-Saint Louis, One University Boulevard, Saint Louis, MO 63121, United States

### **Contents:**

- 1. Cartesian coordinates of the  $\beta$ -CD/PC complex**
- 2. Cartesian coordinates of the  $\beta$ -CD/BC complex**
- 3. Cartesian coordinates of the  $\beta$ -CD/CY complex**
- 4. Cartesian coordinates of the  $\beta$ -CD/CF complex**

# 1. Cartesian coordinates of the $\beta$ -CD/PC complex

**Table S1.** ONIOM2(B971/6-31G(d):PM6) Optimized Model Cartesian coordinates for the Complex of PC with  $\beta$ -CD.

|     |            |           |           |
|-----|------------|-----------|-----------|
| 180 |            |           |           |
| C   | -12.907000 | 3.869000  | 21.681000 |
| H   | -13.990000 | 3.648000  | 21.739000 |
| O   | -12.656000 | 5.225000  | 22.035999 |
| C   | -12.144000 | 2.886000  | 22.579000 |
| H   | -12.396000 | 1.868000  | 22.273001 |
| O   | -12.502000 | 3.067000  | 23.962999 |
| H   | -12.207000 | 3.961000  | 24.238001 |
| C   | -10.645000 | 3.091000  | 22.457001 |
| H   | -10.377000 | 4.045000  | 22.921000 |
| O   | -10.018000 | 1.997000  | 23.145000 |
| H   | -9.052000  | 2.161000  | 23.174999 |
| C   | -10.175000 | 3.092000  | 21.002001 |
| H   | -10.175000 | 2.075000  | 20.601999 |
| C   | -11.073000 | 3.976000  | 20.120001 |
| H   | -10.905000 | 5.018000  | 20.398001 |
| O   | -12.456000 | 3.643000  | 20.344999 |
| C   | -10.773000 | 3.861000  | 18.624001 |
| H   | -11.157000 | 2.924000  | 18.212999 |
| H   | -9.695000  | 3.903000  | 18.451000 |
| O   | -11.395000 | 4.982000  | 17.974001 |
| H   | -10.903000 | 5.188000  | 17.152000 |
| C   | -14.201000 | 8.456000  | 24.014000 |
| H   | -14.766000 | 9.091000  | 24.724001 |
| O   | -13.399000 | 9.262000  | 23.148001 |
| C   | -13.329000 | 7.508000  | 24.834000 |
| H   | -13.960000 | 6.927000  | 25.510000 |
| O   | -12.395000 | 8.263000  | 25.608000 |
| H   | -11.985000 | 8.935000  | 25.044001 |
| C   | -12.552000 | 6.571000  | 23.934000 |
| H   | -11.838000 | 7.147000  | 23.336000 |
| O   | -11.869000 | 5.623000  | 24.777000 |
| H   | -11.543000 | 6.086000  | 25.573000 |
| C   | -13.503000 | 5.814000  | 23.013000 |
| H   | -14.055000 | 5.063000  | 23.586000 |
| C   | -14.497000 | 6.758000  | 22.309999 |
| H   | -13.963000 | 7.350000  | 21.563999 |
| O   | -15.106000 | 7.642000  | 23.271000 |
| C   | -15.609000 | 5.990000  | 21.598000 |
| H   | -16.261000 | 5.486000  | 22.315001 |
| H   | -15.184000 | 5.242000  | 20.926001 |
| O   | -16.370001 | 6.916000  | 20.815001 |
| H   | -16.916000 | 6.378000  | 20.197001 |
| C   | -12.824000 | 13.221000 | 22.132999 |
| H   | -13.006000 | 14.309000 | 22.025000 |
| O   | -11.565000 | 12.871000 | 21.569000 |
| C   | -12.851000 | 12.912000 | 23.629000 |
| H   | -13.763000 | 13.334000 | 24.059000 |
| O   | -11.705000 | 13.512000 | 24.254999 |
| H   | -11.318000 | 14.161000 | 23.638000 |
| C   | -12.799000 | 11.421000 | 23.903000 |
| H   | -11.787000 | 11.068000 | 23.677000 |

|   |            |           |           |
|---|------------|-----------|-----------|
| O | -13.114000 | 11.238000 | 25.296000 |
| H | -12.261000 | 11.198000 | 25.785999 |
| C | -13.806000 | 10.630000 | 23.070999 |
| H | -14.818000 | 10.777000 | 23.455999 |
| C | -13.787000 | 11.065000 | 21.598000 |
| H | -12.856000 | 10.724000 | 21.139000 |
| O | -13.876000 | 12.498000 | 21.503000 |
| C | -14.961000 | 10.482000 | 20.813999 |
| H | -15.905000 | 10.914000 | 21.153999 |
| H | -15.007000 | 9.399000  | 20.941000 |
| O | -14.754000 | 10.786000 | 19.427999 |
| H | -14.745000 | 11.755000 | 19.320999 |
| C | -8.667000  | 14.659000 | 19.261000 |
| H | -8.164000  | 15.353000 | 18.559000 |
| O | -7.779000  | 13.640000 | 19.697001 |
| C | -9.117000  | 15.455000 | 20.489000 |
| H | -9.714000  | 16.316999 | 20.180000 |
| O | -7.936000  | 15.901000 | 21.181000 |
| H | -7.257000  | 15.210000 | 21.104000 |
| C | -9.924000  | 14.572000 | 21.431999 |
| H | -9.263000  | 13.828000 | 21.877001 |
| O | -10.498000 | 15.395000 | 22.465000 |
| H | -9.777000  | 15.740000 | 23.042000 |
| C | -11.053000 | 13.866000 | 20.688000 |
| H | -11.812000 | 14.600000 | 20.403000 |
| C | -10.569000 | 13.163000 | 19.413000 |
| H | -9.935000  | 12.320000 | 19.684000 |
| O | -9.810000  | 14.089000 | 18.622000 |
| C | -11.744000 | 12.635000 | 18.584000 |
| H | -12.366000 | 13.461000 | 18.232000 |
| H | -12.360000 | 11.971000 | 19.191999 |
| O | -11.240000 | 11.896000 | 17.461000 |
| H | -11.073000 | 12.544000 | 16.747000 |
| C | -4.599000  | 11.425000 | 18.601000 |
| H | -3.650000  | 11.049000 | 18.173000 |
| O | -5.302000  | 10.363000 | 19.245001 |
| C | -4.277000  | 12.573000 | 19.566999 |
| H | -3.702000  | 13.334000 | 19.033001 |
| O | -3.509000  | 12.096000 | 20.684000 |
| H | -4.057000  | 11.454000 | 21.186001 |
| C | -5.546000  | 13.182000 | 20.127001 |
| H | -6.012000  | 12.452000 | 20.795000 |
| O | -5.194000  | 14.389000 | 20.837999 |
| H | -4.599000  | 14.174000 | 21.594999 |
| C | -6.528000  | 13.569000 | 19.028999 |
| H | -6.224000  | 14.540000 | 18.632000 |
| C | -6.651000  | 12.544000 | 17.882999 |
| H | -7.313000  | 11.742000 | 18.219999 |
| O | -5.383000  | 11.960000 | 17.538000 |
| C | -7.245000  | 13.135000 | 16.598000 |
| H | -8.282000  | 13.435000 | 16.754000 |
| H | -7.227000  | 12.395000 | 15.794000 |
| O | -6.470000  | 14.284000 | 16.209000 |
| H | -5.615000  | 13.956000 | 15.862000 |
| C | -4.280000  | 6.651000  | 20.836000 |
| H | -3.618000  | 5.878000  | 21.271999 |
| O | -5.606000  | 6.169000  | 20.712999 |
| C | -4.251000  | 7.852000  | 21.780001 |

|   |            |           |           |
|---|------------|-----------|-----------|
| H | -3.211000  | 8.139000  | 21.959999 |
| O | -4.872000  | 7.510000  | 23.034000 |
| H | -5.022000  | 6.549000  | 23.058001 |
| C | -5.013000  | 9.023000  | 21.190001 |
| H | -6.075000  | 8.770000  | 21.118000 |
| O | -4.796000  | 10.131000 | 22.084000 |
| H | -4.877000  | 9.786000  | 22.990000 |
| C | -4.456000  | 9.360000  | 19.811001 |
| H | -3.427000  | 9.712000  | 19.926001 |
| C | -4.442000  | 8.123000  | 18.898001 |
| H | -5.475000  | 7.827000  | 18.698000 |
| O | -3.776000  | 7.037000  | 19.559000 |
| C | -3.744000  | 8.328000  | 17.549000 |
| H | -4.319000  | 9.015000  | 16.927000 |
| H | -3.653000  | 7.378000  | 17.017000 |
| O | -2.439000  | 8.885000  | 17.775999 |
| H | -2.001000  | 9.050000  | 16.927999 |
| C | -7.780000  | 2.766000  | 20.850000 |
| H | -8.136000  | 1.718000  | 20.846001 |
| O | -8.874000  | 3.673000  | 21.007000 |
| C | -6.774000  | 2.923000  | 21.997999 |
| H | -5.942000  | 2.232000  | 21.840000 |
| O | -7.415000  | 2.626000  | 23.249001 |
| H | -6.738000  | 2.481000  | 23.947001 |
| C | -6.271000  | 4.354000  | 22.041000 |
| H | -7.114000  | 5.013000  | 22.261999 |
| O | -5.265000  | 4.481000  | 23.070000 |
| H | -4.665000  | 3.704000  | 23.073000 |
| C | -5.680000  | 4.752000  | 20.690001 |
| H | -4.700000  | 4.285000  | 20.556999 |
| C | -6.585000  | 4.374000  | 19.506001 |
| H | -7.443000  | 5.052000  | 19.520000 |
| O | -7.079000  | 3.031000  | 19.634001 |
| C | -5.943000  | 4.540000  | 18.125000 |
| H | -5.635000  | 5.577000  | 17.981001 |
| H | -6.671000  | 4.293000  | 17.349001 |
| O | -4.791000  | 3.686000  | 17.980000 |
| H | -4.630000  | 3.180000  | 18.801001 |
| O | -8.131000  | 6.723000  | 23.917999 |
| O | -9.524000  | 7.637000  | 25.438999 |
| N | -8.133000  | 5.956000  | 26.277000 |
| H | -7.306000  | 6.446000  | 26.671000 |
| H | -8.853000  | 5.975000  | 27.021999 |
| C | -9.974000  | 7.884000  | 19.497999 |
| H | -9.724000  | 6.842000  | 19.285999 |
| C | -9.282000  | 8.282000  | 20.799999 |
| C | -9.013000  | 9.623000  | 21.091999 |
| H | -9.287000  | 10.399000 | 20.386999 |
| C | -9.503000  | 8.711000  | 18.284000 |
| H | -9.893000  | 8.282000  | 17.358999 |
| H | -8.413000  | 8.714000  | 18.226000 |
| H | -9.849000  | 9.744000  | 18.339001 |
| C | -11.505000 | 7.989000  | 19.642000 |
| H | -11.999000 | 7.645000  | 18.732000 |
| H | -11.809000 | 9.021000  | 19.827999 |
| H | -11.853000 | 7.372000  | 20.472000 |
| C | -8.957000  | 7.304000  | 21.743999 |
| H | -9.185000  | 6.259000  | 21.556000 |

|   |           |           |           |
|---|-----------|-----------|-----------|
| C | -8.401000 | 9.983000  | 22.290001 |
| C | -8.371000 | 7.668000  | 22.952000 |
| C | -8.070000 | 9.000000  | 23.211000 |
| H | -7.604000 | 9.279000  | 24.152000 |
| C | -8.124000 | 11.433000 | 22.615999 |
| H | -8.047000 | 12.019000 | 21.702999 |
| H | -8.926000 | 11.841000 | 23.236000 |
| H | -7.185000 | 11.535000 | 23.165001 |
| C | -8.630000 | 6.865000  | 25.164000 |
| C | -7.751000 | 4.567000  | 25.816999 |
| H | -7.338000 | 4.024000  | 26.667999 |
| H | -7.003000 | 4.655000  | 25.023001 |
| H | -8.648000 | 4.060000  | 25.448000 |

## 2. Cartesian coordinates of the $\beta$ -CD/BC complex ( $RC_{QM}$ )

**Table S2.** ONIOM2(B971/6-31G(d):PM6) Optimized Model Cartesian coordinates for the Complex of BC with  $\beta$ -CD.

177

|   |            |            |           |
|---|------------|------------|-----------|
| C | -20.882999 | -19.437000 | 23.862000 |
| H | -21.273001 | -18.955999 | 22.947001 |
| O | -19.653000 | -18.849001 | 24.278999 |
| C | -21.940001 | -19.266001 | 24.948000 |
| H | -22.882999 | -19.688000 | 24.594999 |
| O | -22.120001 | -17.867001 | 25.240000 |
| H | -22.872999 | -17.775000 | 25.857000 |
| C | -21.507000 | -19.975000 | 26.214001 |
| H | -20.625000 | -19.469000 | 26.615000 |
| O | -22.607000 | -19.902000 | 27.143999 |
| H | -22.527000 | -20.627001 | 27.794001 |
| C | -21.173000 | -21.441999 | 25.931000 |
| H | -22.096001 | -22.003000 | 25.763000 |
| C | -20.235001 | -21.604000 | 24.716999 |
| H | -19.243999 | -21.242001 | 25.002001 |
| O | -20.716000 | -20.827000 | 23.614000 |
| C | -20.101000 | -23.048000 | 24.223000 |
| H | -20.954000 | -23.320000 | 23.596001 |
| H | -20.056000 | -23.740999 | 25.065001 |
| O | -18.879999 | -23.159000 | 23.468000 |
| H | -18.139000 | -23.100000 | 24.101999 |
| C | -16.812000 | -16.205000 | 22.940001 |
| H | -16.285000 | -15.495000 | 22.273001 |
| O | -16.134001 | -16.311001 | 24.193001 |
| C | -18.239000 | -15.666000 | 23.112000 |
| H | -18.712999 | -15.607000 | 22.129000 |
| O | -18.230000 | -14.350000 | 23.698999 |
| H | -18.014999 | -13.703000 | 22.997000 |
| C | -19.054001 | -16.601999 | 23.976999 |
| H | -18.608000 | -16.665001 | 24.973000 |
| O | -20.412001 | -16.118000 | 24.033001 |
| H | -20.958000 | -16.794001 | 24.497000 |
| C | -19.082001 | -17.972000 | 23.319000 |
| H | -19.674000 | -17.910999 | 22.402000 |
| C | -17.679001 | -18.490999 | 22.969999 |
| H | -17.180000 | -18.753000 | 23.905001 |

|   |            |            |           |
|---|------------|------------|-----------|
| O | -16.892000 | -17.483999 | 22.309000 |
| C | -17.690001 | -19.745001 | 22.086000 |
| H | -18.107000 | -20.587999 | 22.639999 |
| H | -16.672001 | -20.004000 | 21.787001 |
| O | -18.490999 | -19.511999 | 20.912001 |
| H | -18.207001 | -18.688999 | 20.473000 |
| C | -12.427000 | -15.406000 | 25.784000 |
| H | -11.342000 | -15.219000 | 25.906000 |
| O | -13.075000 | -15.425000 | 27.056999 |
| C | -13.034000 | -14.354000 | 24.847000 |
| H | -12.545000 | -14.431000 | 23.872000 |
| O | -12.827000 | -13.024000 | 25.358999 |
| H | -13.324000 | -12.921000 | 26.195999 |
| C | -14.525000 | -14.618000 | 24.688999 |
| H | -15.012000 | -14.558000 | 25.666000 |
| O | -15.067000 | -13.620000 | 23.799999 |
| H | -14.758000 | -13.769000 | 22.882999 |
| C | -14.736000 | -16.021999 | 24.111000 |
| H | -14.372000 | -16.066999 | 23.082001 |
| C | -13.971000 | -17.076000 | 24.938000 |
| H | -14.455000 | -17.165001 | 25.910999 |
| O | -12.604000 | -16.666000 | 25.135000 |
| C | -13.960000 | -18.462999 | 24.291000 |
| H | -13.222000 | -18.516001 | 23.487000 |
| H | -14.941000 | -18.697001 | 23.875000 |
| O | -13.650000 | -19.424999 | 25.313000 |
| H | -14.015000 | -20.296000 | 25.055000 |
| C | -12.910000 | -14.198000 | 30.934999 |
| H | -12.676000 | -13.680000 | 31.882000 |
| O | -13.846000 | -15.256000 | 31.148001 |
| C | -13.491000 | -13.173000 | 29.958000 |
| H | -12.773000 | -12.363000 | 29.802999 |
| O | -14.714000 | -12.636000 | 30.487000 |
| H | -14.529000 | -12.197000 | 31.330999 |
| C | -13.809000 | -13.842000 | 28.634001 |
| H | -14.603000 | -14.574000 | 28.799999 |
| O | -14.238000 | -12.827000 | 27.708000 |
| H | -15.045000 | -12.411000 | 28.079000 |
| C | -12.581000 | -14.534000 | 28.055000 |
| H | -11.915000 | -13.775000 | 27.635000 |
| C | -11.826000 | -15.373000 | 29.105000 |
| H | -12.387000 | -16.295000 | 29.273001 |
| O | -11.701000 | -14.683000 | 30.360001 |
| C | -10.415000 | -15.754000 | 28.666000 |
| H | -10.449000 | -16.348000 | 27.750999 |
| H | -9.919000  | -16.339001 | 29.443001 |
| O | -9.683000  | -14.541000 | 28.431000 |
| H | -9.801000  | -13.962000 | 29.204000 |
| C | -15.325000 | -17.990000 | 33.797001 |
| H | -15.545000 | -18.552999 | 34.724998 |
| O | -15.998000 | -18.587000 | 32.688999 |
| C | -15.768000 | -16.544001 | 34.026001 |
| H | -15.252000 | -16.166000 | 34.910999 |
| O | -17.184999 | -16.489000 | 34.256001 |
| H | -17.356001 | -16.884001 | 35.127998 |
| C | -15.434000 | -15.647000 | 32.849998 |
| H | -16.046000 | -15.943000 | 31.992001 |
| O | -15.720000 | -14.285000 | 33.259998 |

|   |            |            |           |
|---|------------|------------|-----------|
| H | -16.646999 | -14.061000 | 33.030998 |
| C | -13.952000 | -15.763000 | 32.478001 |
| H | -13.359000 | -15.188000 | 33.191002 |
| C | -13.446000 | -17.219000 | 32.456001 |
| H | -13.809000 | -17.691000 | 31.542000 |
| O | -13.919000 | -17.962999 | 33.590000 |
| C | -11.921000 | -17.309000 | 32.488998 |
| H | -11.535000 | -16.898001 | 33.424000 |
| H | -11.477000 | -16.763000 | 31.658001 |
| O | -11.556000 | -18.693001 | 32.383999 |
| H | -12.052000 | -19.177000 | 33.070000 |
| C | -17.683001 | -22.312000 | 31.806000 |
| H | -17.829000 | -23.403999 | 31.916000 |
| O | -18.485001 | -21.785999 | 30.750999 |
| C | -18.070999 | -21.658001 | 33.127998 |
| H | -17.565001 | -22.167999 | 33.952000 |
| O | -19.490000 | -21.774000 | 33.292999 |
| H | -19.903000 | -21.663000 | 32.422001 |
| C | -17.719000 | -20.184000 | 33.158001 |
| H | -18.306000 | -19.643999 | 32.410000 |
| O | -18.055000 | -19.742001 | 34.488998 |
| H | -18.966000 | -20.059999 | 34.667999 |
| C | -16.230000 | -19.990999 | 32.862999 |
| H | -15.629000 | -20.410999 | 33.674999 |
| C | -15.856000 | -20.712000 | 31.551001 |
| H | -16.351000 | -20.193001 | 30.726999 |
| O | -16.302999 | -22.076000 | 31.561001 |
| C | -14.358000 | -20.763000 | 31.243000 |
| H | -13.942000 | -19.757000 | 31.181000 |
| H | -14.190000 | -21.261000 | 30.285000 |
| O | -13.690000 | -21.497000 | 32.282001 |
| H | -14.063000 | -22.396999 | 32.300999 |
| C | -20.879000 | -23.094000 | 27.700001 |
| H | -21.542000 | -23.677000 | 27.030001 |
| O | -20.458000 | -21.884001 | 27.077999 |
| C | -21.594999 | -22.792999 | 29.018000 |
| H | -21.843000 | -23.733000 | 29.511999 |
| O | -22.802000 | -22.055000 | 28.773001 |
| H | -23.388000 | -22.568001 | 28.164000 |
| C | -20.680000 | -21.964001 | 29.908001 |
| H | -20.455999 | -21.020000 | 29.403999 |
| O | -21.350000 | -21.719999 | 31.170000 |
| H | -21.634001 | -22.584000 | 31.552999 |
| C | -19.374001 | -22.725000 | 30.152000 |
| H | -19.577999 | -23.569000 | 30.813000 |
| C | -18.742001 | -23.247999 | 28.844999 |
| H | -18.323999 | -22.400999 | 28.295000 |
| O | -19.746000 | -23.893000 | 28.034000 |
| C | -17.615999 | -24.260000 | 29.083000 |
| H | -18.006001 | -25.172001 | 29.541000 |
| H | -16.850000 | -23.841999 | 29.738001 |
| O | -17.016001 | -24.568001 | 27.816000 |
| H | -16.283001 | -25.211000 | 27.969000 |
| O | -18.135000 | -16.878000 | 27.413000 |
| O | -18.007999 | -18.516001 | 29.061001 |
| O | -20.677000 | -15.370000 | 26.825001 |
| O | -19.125999 | -13.875000 | 27.534000 |
| N | -20.201000 | -13.328000 | 25.507000 |

|   |            |            |           |
|---|------------|------------|-----------|
| H | -19.570999 | -13.706000 | 24.777000 |
| H | -19.836000 | -12.378000 | 25.694000 |
| C | -17.257000 | -17.872000 | 28.002001 |
| C | -19.341000 | -17.007000 | 28.049000 |
| C | -19.259001 | -17.973000 | 29.021000 |
| C | -16.032000 | -17.181999 | 28.596001 |
| H | -15.330000 | -17.920000 | 28.987000 |
| H | -15.529000 | -16.587000 | 27.834000 |
| H | -16.332001 | -16.525000 | 29.412001 |
| C | -16.903999 | -18.909000 | 26.937000 |
| H | -16.407000 | -18.427999 | 26.096001 |
| H | -16.236000 | -19.669001 | 27.348000 |
| H | -17.806999 | -19.400000 | 26.570999 |
| C | -20.535999 | -16.327999 | 27.808001 |
| C | -20.348000 | -18.309999 | 29.813000 |
| H | -20.245001 | -19.048000 | 30.605000 |
| C | -21.652000 | -16.681999 | 28.568001 |
| H | -22.597000 | -16.170000 | 28.388000 |
| C | -21.561001 | -17.656000 | 29.573999 |
| H | -22.438999 | -17.891001 | 30.176001 |
| C | -19.959999 | -14.233000 | 26.724001 |
| C | -21.620001 | -13.344000 | 24.971001 |
| H | -21.917999 | -14.381000 | 24.806000 |
| H | -21.645000 | -12.783000 | 24.033001 |
| H | -22.278000 | -12.877000 | 25.708000 |

### 3. Cartesian coordinates of the $\beta$ -CD/CY complexe (RC<sub>QM</sub>)

**Table S3.** ONIOM2(B971/6-31G(d):PM6) Optimized Model Cartesian coordinates for the Complex of CY with  $\beta$ -CD.

|     |           |          |           |
|-----|-----------|----------|-----------|
| 174 |           |          |           |
| C   | 0.364000  | 5.595000 | -0.886000 |
| H   | 0.892000  | 6.502000 | -1.255000 |
| O   | 1.246000  | 4.487000 | -0.647000 |
| C   | -0.337000 | 5.779000 | 0.489000  |
| H   | -0.804000 | 6.790000 | 0.590000  |
| O   | 0.646000  | 5.747000 | 1.531000  |
| H   | 1.553000  | 5.418000 | 1.185000  |
| C   | -1.381000 | 4.667000 | 0.716000  |
| H   | -0.909000 | 3.682000 | 0.951000  |
| O   | -2.168000 | 5.043000 | 1.859000  |
| H   | -3.101000 | 4.632000 | 1.770000  |
| C   | -2.278000 | 4.567000 | -0.540000 |
| H   | -2.791000 | 5.533000 | -0.756000 |
| C   | -1.403000 | 4.129000 | -1.732000 |
| H   | -0.795000 | 3.220000 | -1.510000 |
| O   | -0.497000 | 5.257000 | -1.951000 |
| C   | -2.141000 | 3.977000 | -3.068000 |
| H   | -1.883000 | 4.803000 | -3.761000 |
| H   | -3.244000 | 3.913000 | -2.937000 |
| O   | -1.819000 | 2.725000 | -3.664000 |
| H   | -0.847000 | 2.672000 | -3.905000 |
| C   | 5.056000  | 3.235000 | -1.741000 |
| H   | 6.002000  | 3.167000 | -2.314000 |
| O   | 4.762000  | 2.074000 | -0.955000 |



|   |          |           |           |
|---|----------|-----------|-----------|
| C | 4.989000 | 4.385000  | -0.703000 |
| H | 5.284000 | 5.364000  | -1.152000 |
| O | 5.918000 | 4.195000  | 0.345000  |
| H | 6.082000 | 3.214000  | 0.518000  |
| C | 3.556000 | 4.434000  | -0.122000 |
| H | 3.349000 | 3.546000  | 0.518000  |
| O | 3.354000 | 5.611000  | 0.677000  |
| H | 4.144000 | 5.759000  | 1.258000  |
| C | 2.546000 | 4.570000  | -1.279000 |
| H | 2.667000 | 5.548000  | -1.798000 |
| C | 2.675000 | 3.380000  | -2.253000 |
| H | 2.463000 | 2.402000  | -1.751000 |
| O | 4.051000 | 3.353000  | -2.736000 |
| C | 1.841000 | 3.537000  | -3.532000 |
| H | 2.494000 | 3.642000  | -4.422000 |
| H | 1.128000 | 4.387000  | -3.473000 |
| O | 0.984000 | 2.408000  | -3.694000 |
| H | 1.513000 | 1.561000  | -3.777000 |
| C | 5.831000 | -1.950000 | -0.683000 |
| H | 6.362000 | -2.871000 | -1.015000 |
| O | 4.729000 | -2.205000 | 0.206000  |
| C | 6.717000 | -0.940000 | 0.094000  |
| H | 7.756000 | -0.916000 | -0.318000 |
| O | 6.894000 | -1.413000 | 1.421000  |
| H | 6.007000 | -1.632000 | 1.839000  |
| C | 6.106000 | 0.478000  | 0.137000  |
| H | 5.344000 | 0.564000  | 0.947000  |
| O | 7.125000 | 1.459000  | 0.378000  |
| H | 7.672000 | 1.196000  | 1.159000  |
| C | 5.517000 | 0.878000  | -1.232000 |
| H | 6.320000 | 1.068000  | -1.976000 |
| C | 4.510000 | -0.191000 | -1.704000 |
| H | 3.711000 | -0.355000 | -0.942000 |
| O | 5.259000 | -1.428000 | -1.871000 |
| C | 3.896000 | 0.087000  | -3.081000 |
| H | 4.138000 | -0.718000 | -3.801000 |
| H | 4.202000 | 1.074000  | -3.491000 |
| O | 2.480000 | 0.225000  | -2.944000 |
| H | 2.039000 | -0.647000 | -2.724000 |
| C | 2.126000 | -5.257000 | 1.013000  |
| H | 1.686000 | -6.267000 | 1.201000  |
| O | 1.167000 | -4.329000 | 0.496000  |
| C | 2.787000 | -4.595000 | 2.242000  |
| H | 3.392000 | -5.363000 | 2.785000  |
| O | 1.709000 | -4.182000 | 3.087000  |
| H | 2.079000 | -3.735000 | 3.890000  |
| C | 3.654000 | -3.370000 | 1.879000  |
| H | 3.018000 | -2.450000 | 1.775000  |
| O | 4.496000 | -3.032000 | 2.981000  |
| H | 5.150000 | -3.740000 | 3.177000  |
| C | 4.506000 | -3.577000 | 0.608000  |
| H | 5.483000 | -4.065000 | 0.829000  |
| C | 3.752000 | -4.304000 | -0.520000 |
| H | 2.955000 | -3.632000 | -0.944000 |
| O | 3.107000 | -5.489000 | 0.004000  |
| C | 4.660000 | -4.844000 | -1.637000 |
| H | 4.813000 | -4.080000 | -2.428000 |
| H | 4.232000 | -5.765000 | -2.078000 |

|   |           |           |           |
|---|-----------|-----------|-----------|
| O | 5.985000  | -5.089000 | -1.158000 |
| H | 6.032000  | -5.970000 | -0.721000 |
| C | -2.443000 | -4.754000 | -1.565000 |
| H | -3.096000 | -4.988000 | -2.439000 |
| O | -3.029000 | -3.809000 | -0.650000 |
| C | -2.043000 | -5.976000 | -0.704000 |
| H | -1.802000 | -6.855000 | -1.354000 |
| O | -3.153000 | -6.423000 | 0.054000  |
| H | -3.619000 | -5.654000 | 0.506000  |
| C | -0.860000 | -5.671000 | 0.245000  |
| H | -1.194000 | -5.140000 | 1.165000  |
| O | -0.246000 | -6.912000 | 0.629000  |
| H | -0.929000 | -7.520000 | 1.005000  |
| C | 0.259000  | -4.902000 | -0.483000 |
| H | 0.827000  | -5.583000 | -1.158000 |
| C | -0.301000 | -3.663000 | -1.213000 |
| H | -0.757000 | -2.941000 | -0.494000 |
| O | -1.324000 | -4.100000 | -2.144000 |
| C | 0.739000  | -2.986000 | -2.112000 |
| H | 0.632000  | -3.304000 | -3.167000 |
| H | 1.779000  | -3.171000 | -1.745000 |
| O | 0.620000  | -1.558000 | -2.019000 |
| H | -0.233000 | -1.257000 | -2.414000 |
| C | -6.291000 | -1.256000 | -0.678000 |
| H | -7.292000 | -0.853000 | -0.927000 |
| O | -5.392000 | -0.257000 | -0.153000 |
| C | -6.282000 | -2.339000 | 0.428000  |
| H | -7.131000 | -3.056000 | 0.291000  |
| O | -6.561000 | -1.727000 | 1.678000  |
| H | -6.002000 | -0.908000 | 1.807000  |
| C | -4.940000 | -3.104000 | 0.493000  |
| H | -4.182000 | -2.555000 | 1.096000  |
| O | -5.169000 | -4.390000 | 1.089000  |
| H | -5.533000 | -4.284000 | 1.999000  |
| C | -4.403000 | -3.446000 | -0.912000 |
| H | -4.953000 | -4.314000 | -1.351000 |
| C | -4.412000 | -2.226000 | -1.852000 |
| H | -3.752000 | -1.408000 | -1.478000 |
| O | -5.777000 | -1.706000 | -1.910000 |
| C | -4.076000 | -2.566000 | -3.309000 |
| H | -2.978000 | -2.692000 | -3.437000 |
| H | -4.439000 | -1.775000 | -3.995000 |
| O | -4.598000 | -3.844000 | -3.684000 |
| H | -5.570000 | -3.789000 | -3.818000 |
| C | -4.597000 | 3.819000  | -0.546000 |
| H | -4.772000 | 4.866000  | -0.870000 |
| O | -3.234000 | 3.560000  | -0.169000 |
| C | -5.462000 | 3.374000  | 0.657000  |
| H | -6.514000 | 3.719000  | 0.519000  |
| O | -4.926000 | 4.072000  | 1.791000  |
| H | -5.305000 | 3.680000  | 2.620000  |
| C | -5.389000 | 1.846000  | 0.873000  |
| H | -4.394000 | 1.543000  | 1.291000  |
| O | -6.282000 | 1.471000  | 1.911000  |
| H | -7.221000 | 1.471000  | 1.619000  |
| C | -5.670000 | 1.116000  | -0.463000 |
| H | -6.719000 | 1.245000  | -0.802000 |
| C | -4.661000 | 1.599000  | -1.532000 |

|   |           |           |           |
|---|-----------|-----------|-----------|
| H | -3.609000 | 1.428000  | -1.199000 |
| O | -4.873000 | 3.038000  | -1.691000 |
| C | -4.874000 | 1.044000  | -2.946000 |
| H | -5.237000 | 1.831000  | -3.636000 |
| H | -5.569000 | 0.175000  | -2.958000 |
| O | -3.649000 | 0.489000  | -3.418000 |
| H | -3.006000 | 1.219000  | -3.657000 |
| O | -0.573000 | 2.386000  | 2.824000  |
| O | 1.211000  | 2.790000  | 4.219000  |
| N | -0.354000 | 4.471000  | 3.705000  |
| H | -1.342000 | 4.465000  | 3.364000  |
| H | 0.156000  | 5.052000  | 2.985000  |
| C | -0.602000 | 0.022000  | 3.476000  |
| C | -0.278000 | -1.332000 | 3.118000  |
| C | -0.235000 | 1.018000  | 2.534000  |
| C | 0.350000  | -1.603000 | 1.869000  |
| H | 0.587000  | -2.644000 | 1.627000  |
| C | -1.256000 | 0.277000  | 4.713000  |
| H | -1.527000 | 1.296000  | 4.984000  |
| C | -0.609000 | -2.376000 | 4.027000  |
| H | -0.355000 | -3.399000 | 3.748000  |
| C | 0.356000  | 0.759000  | 1.324000  |
| H | 0.590000  | 1.571000  | 0.640000  |
| C | 0.652000  | -0.588000 | 0.987000  |
| H | 1.105000  | -0.807000 | 0.020000  |
| C | -1.564000 | -0.763000 | 5.566000  |
| H | -2.066000 | -0.558000 | 6.508000  |
| C | -1.235000 | -2.100000 | 5.224000  |
| H | -1.483000 | -2.904000 | 5.910000  |
| C | 0.217000  | 3.072000  | 3.625000  |
| C | -0.211000 | 5.097000  | 5.066000  |
| H | -0.544000 | 6.133000  | 4.983000  |
| H | 0.839000  | 5.039000  | 5.346000  |
| H | -0.833000 | 4.542000  | 5.766000  |

#### 4. Cartesian coordinates of the $\beta$ -CD/CF complex (RC<sub>QM</sub>)

**Table S4.** ONIOM2(B971/6-31G(d):PM6) Optimized Model Cartesian coordinates for the Complex of CF with  $\beta$ -CD.

179

|   |           |           |           |
|---|-----------|-----------|-----------|
| C | -2.529000 | -5.220000 | 0.517000  |
| H | -2.395000 | -6.264000 | 0.873000  |
| O | -1.286000 | -4.491000 | 0.462000  |
| C | -3.164000 | -5.120000 | -0.899000 |
| H | -3.788000 | -6.028000 | -1.102000 |
| O | -2.108000 | -5.051000 | -1.861000 |
| H | -1.531000 | -5.867000 | -1.792000 |
| C | -3.999000 | -3.855000 | -1.166000 |
| H | -3.400000 | -3.090000 | -1.717000 |
| O | -5.079000 | -4.307000 | -1.989000 |
| H | -5.560000 | -3.519000 | -2.368000 |
| C | -4.629000 | -3.252000 | 0.111000  |
| H | -5.575000 | -3.787000 | 0.358000  |
| C | -3.659000 | -3.230000 | 1.305000  |
| H | -2.744000 | -2.636000 | 1.086000  |
| O | -3.276000 | -4.610000 | 1.556000  |

|   |           |           |           |
|---|-----------|-----------|-----------|
| C | -4.332000 | -2.770000 | 2.602000  |
| H | -4.826000 | -3.606000 | 3.129000  |
| H | -5.063000 | -1.951000 | 2.406000  |
| O | -3.352000 | -2.151000 | 3.455000  |
| H | -2.953000 | -2.822000 | 4.050000  |
| C | 2.799000  | -5.057000 | 0.845000  |
| H | 3.772000  | -5.383000 | 1.268000  |
| O | 2.900000  | -3.826000 | 0.108000  |
| C | 2.081000  | -6.109000 | -0.040000 |
| H | 2.106000  | -7.113000 | 0.458000  |
| O | 2.807000  | -6.328000 | -1.236000 |
| H | 2.826000  | -5.502000 | -1.810000 |
| C | 0.632000  | -5.685000 | -0.361000 |
| H | 0.600000  | -4.910000 | -1.164000 |
| O | -0.125000 | -6.820000 | -0.819000 |
| H | 0.428000  | -7.374000 | -1.428000 |
| C | -0.114000 | -5.203000 | 0.903000  |
| H | -0.387000 | -6.064000 | 1.553000  |
| C | 0.717000  | -4.134000 | 1.645000  |
| H | 0.878000  | -3.231000 | 1.005000  |
| O | 2.012000  | -4.712000 | 1.975000  |
| C | 0.120000  | -3.760000 | 3.003000  |
| H | 0.321000  | -4.530000 | 3.773000  |
| H | -0.971000 | -3.567000 | 2.920000  |
| O | 0.663000  | -2.505000 | 3.447000  |
| H | 1.627000  | -2.616000 | 3.655000  |
| C | 5.467000  | -1.064000 | -1.338000 |
| H | 6.354000  | -0.525000 | -1.741000 |
| O | 4.583000  | -0.193000 | -0.608000 |
| C | 4.542000  | -1.701000 | -2.399000 |
| H | 5.147000  | -2.144000 | -3.232000 |
| O | 3.792000  | -0.675000 | -3.036000 |
| H | 3.319000  | -0.109000 | -2.353000 |
| C | 3.575000  | -2.754000 | -1.815000 |
| H | 2.596000  | -2.281000 | -1.543000 |
| O | 3.338000  | -3.772000 | -2.805000 |
| H | 2.895000  | -3.385000 | -3.596000 |
| C | 4.123000  | -3.565000 | -0.622000 |
| H | 4.587000  | -4.515000 | -0.977000 |
| C | 5.032000  | -2.763000 | 0.325000  |
| H | 4.415000  | -2.039000 | 0.927000  |
| O | 6.009000  | -2.009000 | -0.435000 |
| C | 5.889000  | -3.638000 | 1.251000  |
| H | 6.849000  | -3.919000 | 0.778000  |
| H | 5.343000  | -4.549000 | 1.576000  |
| O | 6.109000  | -2.925000 | 2.471000  |
| H | 6.895000  | -2.343000 | 2.384000  |
| C | 4.700000  | 3.454000  | 1.238000  |
| H | 4.872000  | 4.259000  | 1.981000  |
| O | 3.530000  | 3.633000  | 0.446000  |
| C | 5.881000  | 3.228000  | 0.266000  |
| H | 6.842000  | 3.224000  | 0.834000  |
| O | 5.860000  | 4.378000  | -0.585000 |
| H | 6.551000  | 4.287000  | -1.289000 |
| C | 5.717000  | 1.938000  | -0.563000 |
| H | 5.029000  | 2.108000  | -1.434000 |
| O | 6.948000  | 1.614000  | -1.204000 |
| H | 7.677000  | 1.471000  | -0.560000 |

|   |           |           |           |
|---|-----------|-----------|-----------|
| C | 5.229000  | 0.742000  | 0.286000  |
| H | 6.076000  | 0.238000  | 0.801000  |
| C | 4.087000  | 1.114000  | 1.257000  |
| H | 3.154000  | 1.363000  | 0.691000  |
| O | 4.487000  | 2.281000  | 2.025000  |
| C | 3.837000  | 0.036000  | 2.317000  |
| H | 4.580000  | 0.075000  | 3.136000  |
| H | 3.827000  | -0.985000 | 1.858000  |
| O | 2.519000  | 0.177000  | 2.868000  |
| H | 2.481000  | 0.986000  | 3.447000  |
| C | -0.013000 | 5.817000  | 0.632000  |
| H | -0.635000 | 6.647000  | 1.026000  |
| O | -0.785000 | 4.791000  | -0.028000 |
| C | 1.027000  | 6.263000  | -0.430000 |
| H | 1.357000  | 7.324000  | -0.259000 |
| O | 0.358000  | 6.334000  | -1.677000 |
| H | -0.123000 | 5.478000  | -1.887000 |
| C | 2.279000  | 5.361000  | -0.507000 |
| H | 2.187000  | 4.586000  | -1.309000 |
| O | 3.339000  | 6.262000  | -0.828000 |
| H | 4.184000  | 5.751000  | -0.970000 |
| C | 2.635000  | 4.696000  | 0.848000  |
| H | 3.151000  | 5.426000  | 1.511000  |
| C | 1.401000  | 4.082000  | 1.531000  |
| H | 0.871000  | 3.356000  | 0.871000  |
| O | 0.519000  | 5.213000  | 1.796000  |
| C | 1.670000  | 3.484000  | 2.913000  |
| H | 1.539000  | 4.236000  | 3.716000  |
| H | 2.682000  | 3.025000  | 2.974000  |
| O | 0.787000  | 2.378000  | 3.153000  |
| H | -0.153000 | 2.716000  | 3.294000  |
| C | -4.860000 | 3.775000  | -0.145000 |
| H | -5.933000 | 3.964000  | 0.065000  |
| O | -4.564000 | 2.418000  | -0.460000 |
| C | -4.282000 | 4.628000  | -1.304000 |
| H | -4.629000 | 5.684000  | -1.217000 |
| O | -4.856000 | 4.080000  | -2.492000 |
| H | -4.342000 | 4.388000  | -3.283000 |
| C | -2.739000 | 4.531000  | -1.328000 |
| H | -2.407000 | 3.504000  | -1.631000 |
| O | -2.199000 | 5.342000  | -2.360000 |
| H | -2.232000 | 6.305000  | -2.144000 |
| C | -2.213000 | 4.913000  | 0.075000  |
| H | -2.494000 | 5.955000  | 0.349000  |
| C | -2.764000 | 3.902000  | 1.107000  |
| H | -2.517000 | 2.848000  | 0.826000  |
| O | -4.214000 | 4.069000  | 1.093000  |
| C | -2.377000 | 4.199000  | 2.559000  |
| H | -3.202000 | 4.699000  | 3.104000  |
| H | -1.445000 | 4.802000  | 2.633000  |
| O | -2.022000 | 2.987000  | 3.234000  |
| H | -2.825000 | 2.411000  | 3.387000  |
| C | -6.188000 | -1.377000 | -0.002000 |
| H | -6.913000 | -2.152000 | 0.320000  |
| O | -4.881000 | -1.883000 | -0.271000 |
| C | -6.628000 | -0.583000 | -1.255000 |
| H | -7.700000 | -0.279000 | -1.176000 |
| O | -6.495000 | -1.512000 | -2.335000 |

|   |           |           |           |
|---|-----------|-----------|-----------|
| H | -6.742000 | -1.059000 | -3.182000 |
| C | -5.732000 | 0.652000  | -1.480000 |
| H | -4.733000 | 0.372000  | -1.885000 |
| O | -6.436000 | 1.435000  | -2.444000 |
| H | -5.926000 | 2.277000  | -2.628000 |
| C | -5.602000 | 1.457000  | -0.165000 |
| H | -6.560000 | 1.963000  | 0.084000  |
| C | -5.102000 | 0.563000  | 0.987000  |
| H | -4.100000 | 0.129000  | 0.754000  |
| O | -6.060000 | -0.526000 | 1.138000  |
| C | -5.108000 | 1.252000  | 2.355000  |
| H | -6.025000 | 1.019000  | 2.928000  |
| H | -4.980000 | 2.354000  | 2.261000  |
| O | -3.951000 | 0.852000  | 3.102000  |
| H | -4.043000 | -0.081000 | 3.426000  |
| O | 1.212000  | 0.800000  | -1.624000 |
| O | 0.165000  | -1.180000 | 0.166000  |
| O | -1.179000 | 0.677000  | 0.337000  |
| N | 0.012000  | -0.147000 | 2.184000  |
| H | 0.562000  | -1.009000 | 2.392000  |
| H | 0.667000  | 0.660000  | 2.303000  |
| C | 1.298000  | 1.735000  | -2.779000 |
| C | 1.132000  | 0.814000  | -4.030000 |
| H | 2.110000  | 0.536000  | -4.453000 |
| H | 0.554000  | 1.309000  | -4.818000 |
| C | 0.441000  | -0.403000 | -3.451000 |
| C | 0.559000  | -0.306000 | -2.062000 |
| C | 0.133000  | 2.720000  | -2.638000 |
| H | -0.823000 | 2.187000  | -2.711000 |
| H | 0.171000  | 3.224000  | -1.663000 |
| H | 0.170000  | 3.474000  | -3.434000 |
| C | 2.662000  | 2.413000  | -2.691000 |
| H | 2.739000  | 3.022000  | -1.774000 |
| H | 3.466000  | 1.664000  | -2.695000 |
| H | 2.804000  | 3.075000  | -3.555000 |
| C | -0.192000 | -1.507000 | -4.021000 |
| H | -0.291000 | -1.590000 | -5.099000 |
| C | 0.028000  | -1.298000 | -1.246000 |
| C | -0.705000 | -2.513000 | -3.186000 |
| H | -1.215000 | -3.378000 | -3.606000 |
| C | -0.596000 | -2.414000 | -1.793000 |
| H | -1.013000 | -3.195000 | -1.145000 |
| C | -0.425000 | -0.151000 | 0.749000  |
| C | -1.151000 | -0.003000 | 3.134000  |
| H | -1.766000 | -0.904000 | 3.053000  |
| H | -1.714000 | 0.886000  | 2.840000  |
| H | -0.736000 | 0.094000  | 4.137000  |
